# Supplementary material
Source: HighWire-hosted journal article supplement (https://www.canjsurg.ca/highwire/filestream/96835/field_highwire_adjunct_files/0/cjs-015417-1-at.pdf)
Supplement: cjs-015417-1-at.pdf [file cjs-015417-1-at.pdf]

**Appendix 1** to Gibson E, Sabo MT. Can pain catastrophizing be changed in surgical patients?A scoping review. *Can J Surg* 2018.

DOI: 10.1503/cjs.015417

Copyright © 2018 The Author(s) or their employer(s).

To receive this resource in an accessible format, please contact us at [cmajgroup@cmaj.ca](mailto:cmajgroup@cmaj.ca).*Online appendices are unedited and posted as supplied by the authors.*

Table A-1. Study Quality Assessment

| First Author | Year | Research question clearly stated? | Sample clearly described? | Demographics clearly described? | Inclusion/exclusion criteria clear and uniformly applied? | Clear description of the intervention? | Clear statement of the catastrophizing outcome? | Overall Quality Score |
|--------------|------|-----------------------------------|---------------------------|---------------------------------|-----------------------------------------------------------|----------------------------------------|-------------------------------------------------|-----------------------|
| Bostick      | 2017 | Good                              | Good                      | Good                            | Good                                                      | Fair                                   | Fair                                            | 4                     |
| Broderick    | 2014 | Good                              | Good                      | Good                            | Good                                                      | Good                                   | Good                                            | 6                     |
| Baudic       | 2016 | Fair                              | Good                      | Good                            | Good                                                      | Good                                   | Fair                                            | 4                     |
| Darnall      | 2016 | Good                              | Poor                      | Poor                            | Fair                                                      | Good                                   | Poor                                            | 2                     |
| Monticone    | 2013 | Good                              | Good                      | Good                            | Good                                                      | Good                                   | Good                                            | 6                     |
| Wideman      | 2012 | Good                              | Fair                      | Fair                            | Fair                                                      | Fair                                   | Fair                                            | 1                     |
| Clarke       | 2012 | Good                              | Good                      | Good                            | Good                                                      | Good                                   | Good                                            | 6                     |
| Chmielewski  | 2011 | Good                              | Good                      | Good                            | Good                                                      | Good                                   | Good                                            | 6                     |
| Edwards      | 2009 | Good                              | Good                      | Good                            | Good                                                      | Good                                   | Good                                            | 6                     |
| Farooq       | 2014 | Good                              | Good                      | Fair                            | Good                                                      | Good                                   | Fair                                            | 4                     |
| Forsythe     | 2008 | Good                              | Good                      | Good                            | Good                                                      | Good                                   | Good                                            | 6                     |
| Miyazaki     | 2016 | Good                              | Good                      | Good                            | Good                                                      | Fair                                   | Good                                            | 5                     |
| Vranceanu    | 2015 | Good                              | Good                      | Good                            | Good                                                      | Good                                   | Good                                            | 6                     |
| Tetsunaga    | 2017 | Good                              | Fair                      | Good                            | Fair                                                      | Fair                                   | Fair                                            | 2                     |
| Tichonova    | 2016 | Good                              | Good                      | Good                            | Good                                                      | Fair                                   | Good                                            | 5                     |
| Peters       | 2009 | Fair                              | Poor                      | Poor                            | Poor                                                      | Poor                                   | Poor                                            | 0                     |
| Eyer         | 2015 | Good                              | Good                      | Good                            | Good                                                      | Good                                   | Good                                            | 6                     |
| Hand         | 2015 | Good                              | Good                      | Fair                            | Good                                                      | Good                                   | Poor                                            | 4                     |
| Lee          | 2014 | Good                              | Good                      | Good                            | Good                                                      | Fair                                   | Fair                                            | 4                     |
| Lluch        | 2017 | Good                              | Good                      | Good                            | Good                                                      | Good                                   | Good                                            | 6                     |
| Kovacs       | 2012 | Good                              | Good                      | Good                            | Good                                                      | Fair                                   | Good                                            | 5                     |
| Ostelo       | 2003 | Good                              | Good                      | Good                            | Fair                                                      | Fair                                   | Good                                            | 4                     |
| Hirakawa     | 2014 | Good                              | Good                      | Good                            | Good                                                      | Good                                   | Good                                            | 6                     |
| Hovik        | 2016 | Good                              | Good                      | Good                            | Good                                                      | Good                                   | Good                                            | 6                     |
| Johansson    | 2016 | Good                              | Good                      | Good                            | Good                                                      | Good                                   | Good                                            | 6                     |
| Johansson    | 2016 | Good                              | Good                      | Good                            | Good                                                      | Good                                   | Good                                            | 6                     |
| Powell       | 2013 | Good                              | Fair                      | Fair                            | Good                                                      | Fair                                   | Poor                                            | 2                     |
| Powell       | 2012 | Good                              | Good                      | Good                            | Fair                                                      | Fair                                   | Poor                                            | 3                     |
| Khan         | 2012 | Good                              | Good                      | Good                            | Good                                                      | Good                                   | Good                                            | 6                     |
| Abbott       | 2010 | Good                              | Good                      | Good                            | Good                                                      | Good                                   | Good                                            | 6                     |
| Barker       | 2008 | Good                              | Good                      | Good                            | Good                                                      | Good                                   | Good                                            | 6                     |
| van Hooff    | 2011 | Good                              | Poor                      | Poor                            | Fair                                                      | Poor                                   | Poor                                            | 1                     |
| Louw         | 2015 | Good                              | Good                      | Good                            | Fair                                                      | Good                                   | Good                                            | 5                     |
| Vranceanu    | 2014 | Good                              | Good                      | Good                            | Good                                                      | Fair                                   | Fair                                            | 4                     |
| Day          | 2010 | Good                              | Poor                      | Poor                            | Fair                                                      | Fair                                   | Good                                            | 2                     |
| Louw         | 2015 | Good                              | Good                      | Good                            | Fair                                                      | Good                                   | Poor                                            | 4                     |
| Chmielewski  | 2016 | Good                              | Good                      | Good                            | Good                                                      | Good                                   | Good                                            | 6                     |
| Riddle       | 2011 | Good                              | Good                      | Good                            | Good                                                      | Good                                   | Good                                            | 6                     |
| Martorella   | 2012 | Good                              | Good                      | Good                            | Good                                                      | Good                                   | Poor                                            | 5                     |
| Rolving      | 2015 | Good                              | Good                      | Good                            | Good                                                      | Good                                   | Fair                                            | 5                     |
| Trost        | 2013 | Good                              | Good                      | Good                            | Fair                                                      | Fair                                   | Poor                                            | 3                     |
| Wade         | 2011 | Good                              | Fair                      | Fair                            | Good                                                      | Fair                                   | Good                                            | 3                     |
| Tetsunaga    | 2015 | Good                              | Fair                      | Fair                            | Fair                                                      | Fair                                   | Fair                                            | 1                     |

**Appendix 1** to Gibson E, Sabo MT. Can pain catastrophizing be changed in surgical patients?  
A scoping review. *Can J Surg* 2018.  
DOI: 10.1503/cjs.015417

*Online appendices are unedited and posted as supplied by the authors.*

|           |      |      |      |      |      |      |      |   |
|-----------|------|------|------|------|------|------|------|---|
| Wibault   | 2017 | Good | Good | Good | Good | Good | Good | 6 |
| Alappattu | 2012 | Good | Good | Good | Fair | Good | Good | 5 |
| Therrien  | 2016 | Good | Fair | Fair | Fair | Poor | Poor | 1 |
| Wibault   | 2015 | Good | Poor | Poor | Poor | Poor | Poor | 1 |
